# Supplementary material
Source: Elsevier journal article supplement (https://www.sciencedirect.com/science/article/pii/S0212656721001013)
Supplement: mmc1 [file S0212656721001013:mmc1.docx]

**ANEXO 1:** Referencias bibliográficas de los artículos incluidos.

**ARTÍCULOS INCLUIDOS EN LA CATEGORÍA “CONVENCE”:**

Turkoski B, Pierce LL, Schreck S, et al. *Clinical nursing judgment related to reducing the incidence of falls by elderly patients*. Rehabil Nurs. 1997;22(3):124-130.

doi: 10.1002/j.2048-7940.1997.tb02081.x

Lee DT, Chan MC, Tam EP, Yeung WS. *Use of physical restraints on elderly patients: an exploratory study of the perceptions of nurses in Hong Kong*. J Adv Nurs. 1999;29(1):153-159.

doi: 10.1046/j.1365-2648.1999.00880.x

Davis, B. and Chien, W. *The use of physical restraint of hospitalized elderly patients*. J Psychiatr Ment Health Nurs. 1999; 6: 249-250.

doi: 10.1046/j.1365-2850.1999.630249.x

Buri, H. and Dawson P. *Caring for a relative with dementia: a theoretical model of coping with fall risk*. Health, risk & society. 2000; 2 (3).

doi: 10.1080/713670166

Horton, K, and Arber, S. *Gender and the negotiation between older people and their carers in the prevention of falls*. Ageing and Society. 2004; 24(1), 75-94.

doi: 10.1017/S0144686X03001569

Bell E, Stirling C. *What tools help make "whole-of-patient" practices happen?: a Tasmanian falls prevention project*. Holist Nurs Pract. 2006;20(3):130-136.

doi: 10.1097/00004650-200605000-00007

Fonad, E, Burnard, P and Emami, A. (2008), *Shielding or caging? Healthcare staffs’ views on fall risk and protection in Stockholm*. Int J Older People Nurs. 2008; 3: 46-54.

doi: 10.1111/j.1748-3743.2007.00106.x

Kilian C, Salmoni A, Ward-Griffin C, Kloseck M. *Perceiving falls within a family context: a focused ethnographic approach*. Can J Aging. 2008;27(4):331-345.

doi: 10.3138/cja.27.4.331

Johansson I, Bachrach-Lindström M, Struksnes S, Hedelin B. *Balancing integrity vs. risk of falling – nurses’ experiences of caring for elderly people with dementia in nursing homes*. JRN. 2009;14(1):61-73.

doi: 10.1177/1744987107086423

Abendroth M, Lutz BJ, Young ME. *Family caregivers' decision process to institutionalize persons with Parkinson's disease: a grounded theory study*. Int J Nurs Stud. 2012;49(4):445-454.

doi: 10.1016/j.ijnurstu.2011.10.003

Häggqvist, B, Stenvall, M, Fjellman-Wiklund, A. et al. *“The balancing act”— Licensed practical nurse experiences of falls and fall prevention: a qualitative study*. BMC Geriatr. 2012; 12, 62.

doi: 10.1186/1471-2318-12-62

McIntyre, AE and Reynolds, F. *There’s no apprenticeship for Alzheimer’s: The caring relationship when an older person experiencing dementia falls*. Ageing and Society. 2012; 32(5), 873 - 896.

doi: 10.1017/S0144686X11000699

Powell-Cope G, Quigley P, Besterman-Dahan K, et al. *A qualitative understanding of patient falls in inpatient mental health units*. J Am Psychiatr Nurses Assoc. 2014;20(5):328-339.

doi:10.1177/1078390314553269

Hurley, K. *Arising from the fall: nurses stories caring for the fallen* (2012). [nº MR95310, University of New Brunswick, Canada. ProQuest Dissertations and Theses, 162]

Da Silva, CP, Carlegis, M., Suchma, K, & Ostwald, SK. *Falling, Balance Confidence, and Fear of Falling After Chronic Stroke*. Physical & Occupational Therapy In Geriatrics. 2014; 32, 353 - 367.

doi: 10.3109/02703181.2014.946639

Bok, A, Pierce, LL, Gies, C. and Steiner, V. *Meanings of Falls and Prevention of Falls According to Rehabilitation Nurses: A Qualitative Descriptive Study*. Rehabil Nurs. 2016; 41: 45-53.

doi: 10.1002/rnj.221

Clancy A, Mahler M. *Nursing staffs' attentiveness to older adults falling in residential care - an interview study*. J Clin Nurs. 2016;25(9-10):1405-1415.

doi: 10.1111/jocn.13240

**ARTÍCULOS INCLUIDOS EN LA CATEGORÍA “DUDOSOS”**

Strumpf NE, Evans LK. *Physical restraint of the hospitalized elderly: perceptions of patients and nurses*. Nurs Res. 1988;37(3):132-137.

PMID 3368353

Hardin, SB, Magee R, Vinson MH, Owen M, Hyatt E, & Stratmann D. *Patient and Family Perceptions of Restraints*. J Holist Nurs. 1993; 11(4), 383–397.

doi: 10.1177/089801019301100407

Newbern VB, Lindsey IH. Attitudes of wives toward having their elderly husbands restrained. Geriatr Nurs. 1994; 15(3):135-141.

doi: 10.1016/s0197-4572(09)90038-6

Gallinagh R, Nevin R, Campbell L, Mitchell F, Ludwick R. *Relatives' perceptions of side rail use on the older person in hospital*. Br J Nurs. 2001; 10(6):391-399.

doi: 10.12968/bjon.2001.10.6.5349

Butler, M, Kerse N, and Coggan C. *The experiences of staff concerning the introduction and impact of a fall prevention intervention in aged care facilities: a qualitative study*. AJA. 2003; 22: 218-221.

doi: 10.1111/j.1741-6612.2003.tb00503.x

Lai CK. *Nurses using physical restraints: Are the accused also the victims? - A study using focus group interviews*. BMC Nurs. 2007; 6:5. Published 2007 Jul 17.

doi: 10.1186/1472-6955-6-5

Phillips VL, Yarmo RD, Hunsaker AE. *Certified nursing aides' and care assistants' views on falls: insight for creation and implementation of fall prevention programs*. J Am Med Dir Assoc. 2008 Mar; 9(3):168-172.

doi: 10.1016/j.jamda.2007.11.012.

Stenberg M. and Wann‐Hansson C*. Health Care Professionals’ Attitudes and Compliance to Clinical Practice Guidelines to Prevent Falls and Fall Injuries*. Worldviews Evid Nurs. 2011; 8: 87-95.

doi: 10.1111/j.1741-6787.2010.00196.x.

Hill EE, Nguyen TH, Shaha M, Wenzel JA, DeForge BR, Spellbring AM. *Person-environment interactions contributing to nursing home resident falls*. Res Gerontol Nurs. 2009; 2(4):287-296.

doi: 10.3928/19404921-20090527-02

Suttanon P, Hill KD, Said CM, Byrne KN, Dodd KJ. *Factors influencing commencement and adherence to a home-based balance exercise program for reducing risk of falls: perceptions of people with Alzheimer's disease and their caregivers*. Int Psychogeriatr. 2012; 24(7):1172-1182.

doi: 10.1017/S1041610211002729

Silveira Vidal DA, Costa Santos SS, Rodrigues Andrade Dias F, Tomaschewski Barlem JG, Porto Gautério D, & Devos Barlem EL. *Proceso de enfermería orientado a la prevención de caídas en los ancianos residentes en instituciones: investigación-acción*. Enfermería Global. 2013; 12(29), 196-206.

Recuperado en 06 de septiembre de 2020, de

[http://scielo.isciii.es/scielo.php?script=sci_arttextHYPERLINK "http://scielo.isciii.es/scielo.php?script=sci_arttext&pid=S1695-61412013000100010&lng=es&tlng=es"&HYPERLINK "http://scielo.isciii.es/scielo.php?script=sci_arttext&pid=S1695-61412013000100010&lng=es&tlng=es"pid=S1695-61412013000100010HYPERLINK "http://scielo.isciii.es/scielo.php?script=sci_arttext&pid=S1695-61412013000100010&lng=es&tlng=es"&HYPERLINK "http://scielo.isciii.es/scielo.php?script=sci_arttext&pid=S1695-61412013000100010&lng=es&tlng=es"lng=esHYPERLINK "http://scielo.isciii.es/scielo.php?script=sci_arttext&pid=S1695-61412013000100010&lng=es&tlng=es"&HYPERLINK "http://scielo.isciii.es/scielo.php?script=sci_arttext&pid=S1695-61412013000100010&lng=es&tlng=es"tlng=es](http://scielo.isciii.es/scielo.php?script=sci_arttext&pid=S1695-61412013000100010&lng=es&tlng=es).

E-ISSN: 1695-6141

Lee DCA, McDermott F, Hoffmann T, Haines TP. “*They will tell me if there is a problema”: limited discussion between health professionals, older adults and their caregivers on falls prevention during and after hospitalization*. Health Educ Res. 2013; 28 (6), 1051–1066.

doi: 10.1093/her/cyt091

Honaker JA, Kretschmer LW*. Impact of fear of falling for patients and caregivers: perceptions before and after participation in vestibular and balance rehabilitation therapy.* Am J Audiol. 2014; 23(1):20-33.

doi: 10.1044/1059-0889(2013/12-0074)

Brock, P. *Nurse perceptions of facility influences on older adult acute* (2015). [nº 3732227, University of Phoenix. ProQuest Dissertations and Theses, 268]
